# Supplementary material
Source: PubMed Central journal article supplement (PMC6795409)
Supplement: jciinsight-4-128713-s113.pdf [file jciinsight-4-128713-s113.pdf]

# Supplemental Figure 1

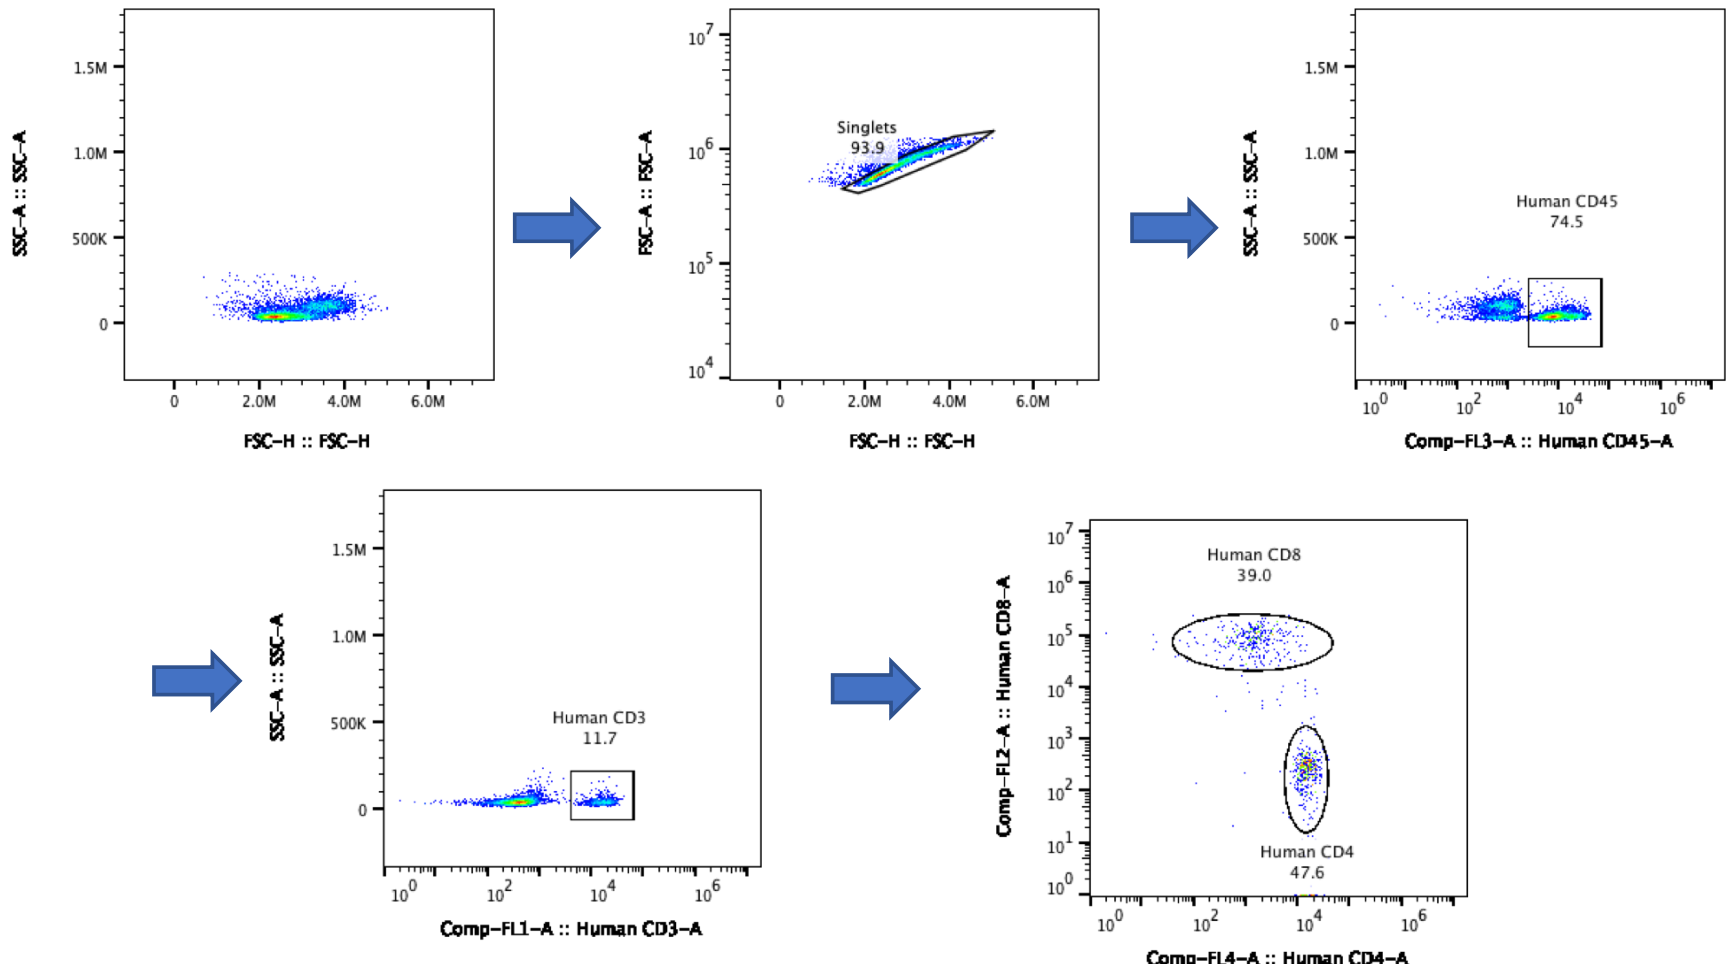

**S. Figure 1. Flow cytometry gating strategy.** Doublets were first excluded. Human CD45<sup>+</sup> cells were then gated followed by gating the CD3<sup>+</sup> T cell population. The human CD45<sup>+</sup>CD3<sup>+</sup> population were then gated for CD4<sup>+</sup> and CD8<sup>+</sup> T cells.

## Supplemental Figure 2

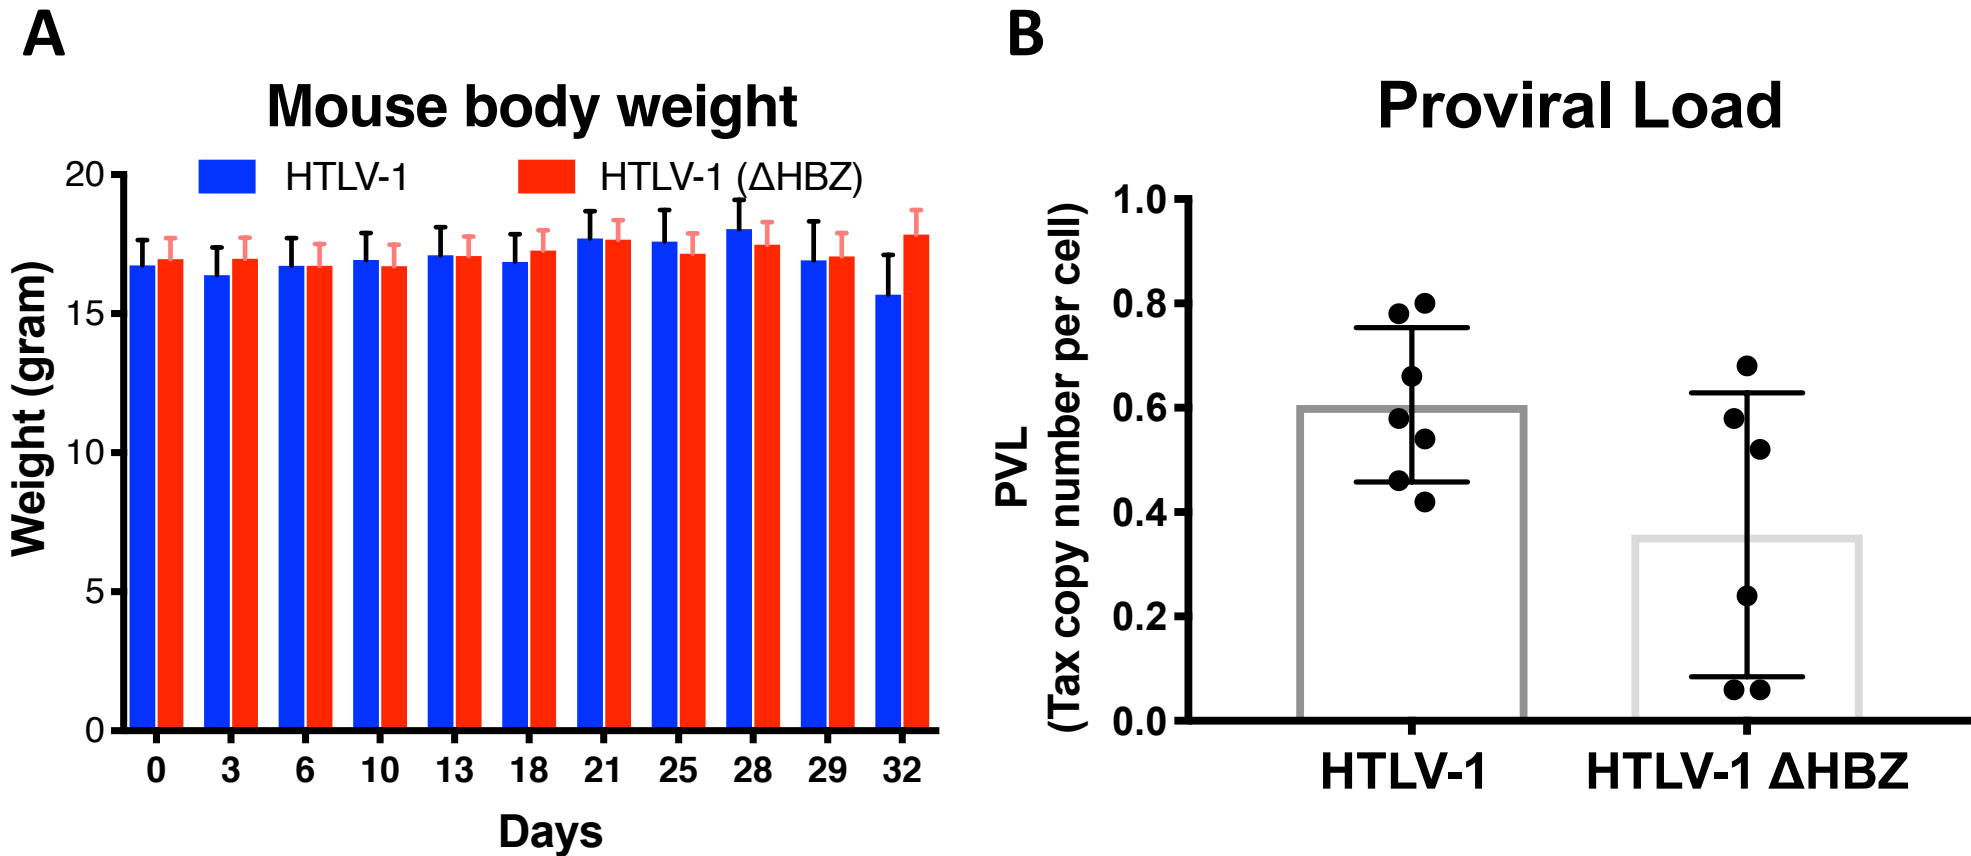

**S. Figure 2. (A)** Whole body weight of mice infected with HTLV-1 and HTLV-1  $\Delta$ HBZ; **(B)** Proviral load measurement by digital droplet PCR of the Tax gene from DNA isolated from the spleen of infected mice (n=6-7 per group). Error bars in this figure represent SEM.

## Supplemental Figure 3

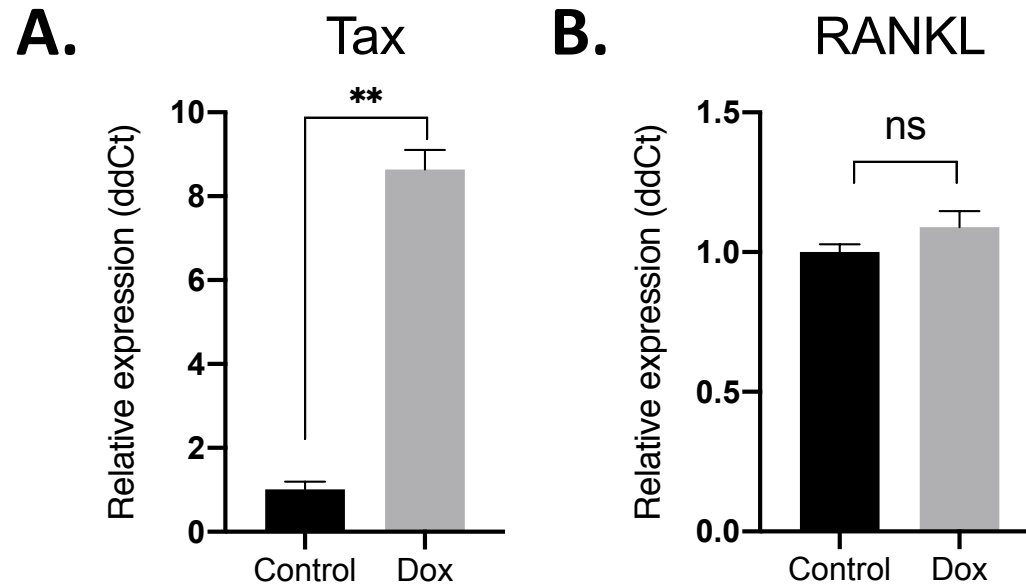

**S. Figure 3.** Inducible Tet-on Tax1 Jurkat cells were cultured with or without 1  $\mu\text{g/ml}$  doxycycline (Dox) for 48 hours. **A)** Tax and **B)** RANKL gene expression were examined by qRT-PCR post Tax induction. Data is representative of 2 biological replicates. Error bars in this figure represent SEM and \*\* indicates p-value (2-tailed distribution, homoscedastic students t-test) of  $p < 0.01$ .

# Supplemental Figure 4

**A.**

UCSC Genome Browser on Mouse  
Dec. 2011 (GRCm38/mm10) Assembly

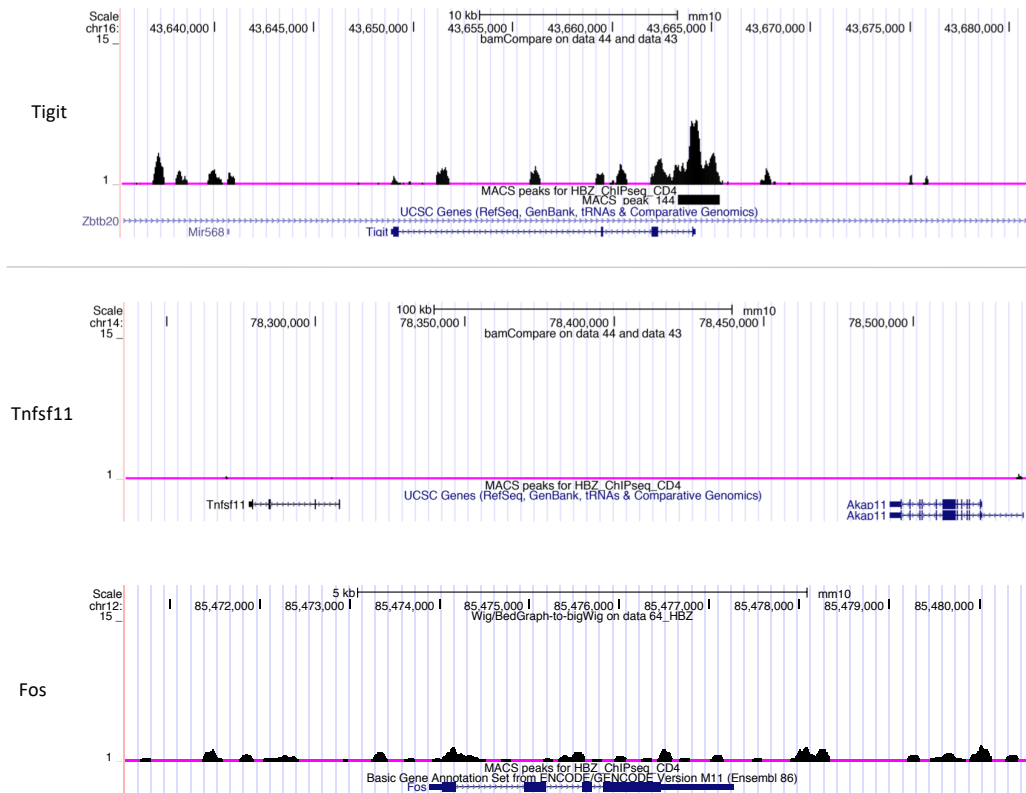

**B.**

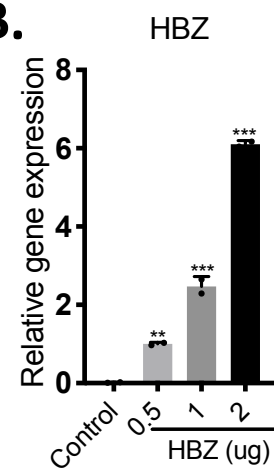

**C.**

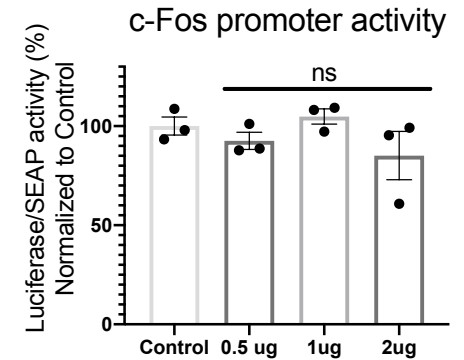

**D.**

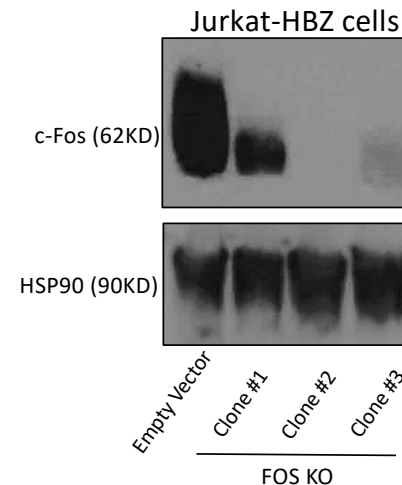

**S. Figure 4. (A)** Visualization of HBZ ChIP-seq data in UCSC genome browser. **Top** is a positive control, showing the peaks of the region, at the *Tigit* gene promoter region, that HBZ was confirmed to interact with (PMID: 26735971); **Middle & Bottom** are the regions within and upstream *Tnfsf11* (RANKL) and *Fos* genes, showing no significant peaks in this region. **B)** Co-transfection of c-Fos promoter luciferase reporter DNA (1ug, GeneCopoeia) and various amount of HBZ expression plasmid DNA (0.5, 1, 2ug) in Jurkat T-cell line via Nucleofection (Lonza). 72 hours post nucleofection, RNA was harvested to evaluate HBZ transcription level; supernatant was collected to evaluate c-Fos promoter activity measured by secreted luciferase activity and normalized to the internal control SEAP (secreted Alkaline Phosphatase) level. **D)** Western blot showing the efficiency of deletion of c-Fos protein in three Jurkat-HBZ cells clones, after stimulation with PMA (10 ng/mL) for 6 hours. Clones were obtained by standard limiting dilution assay.



# Supplemental Figure 5

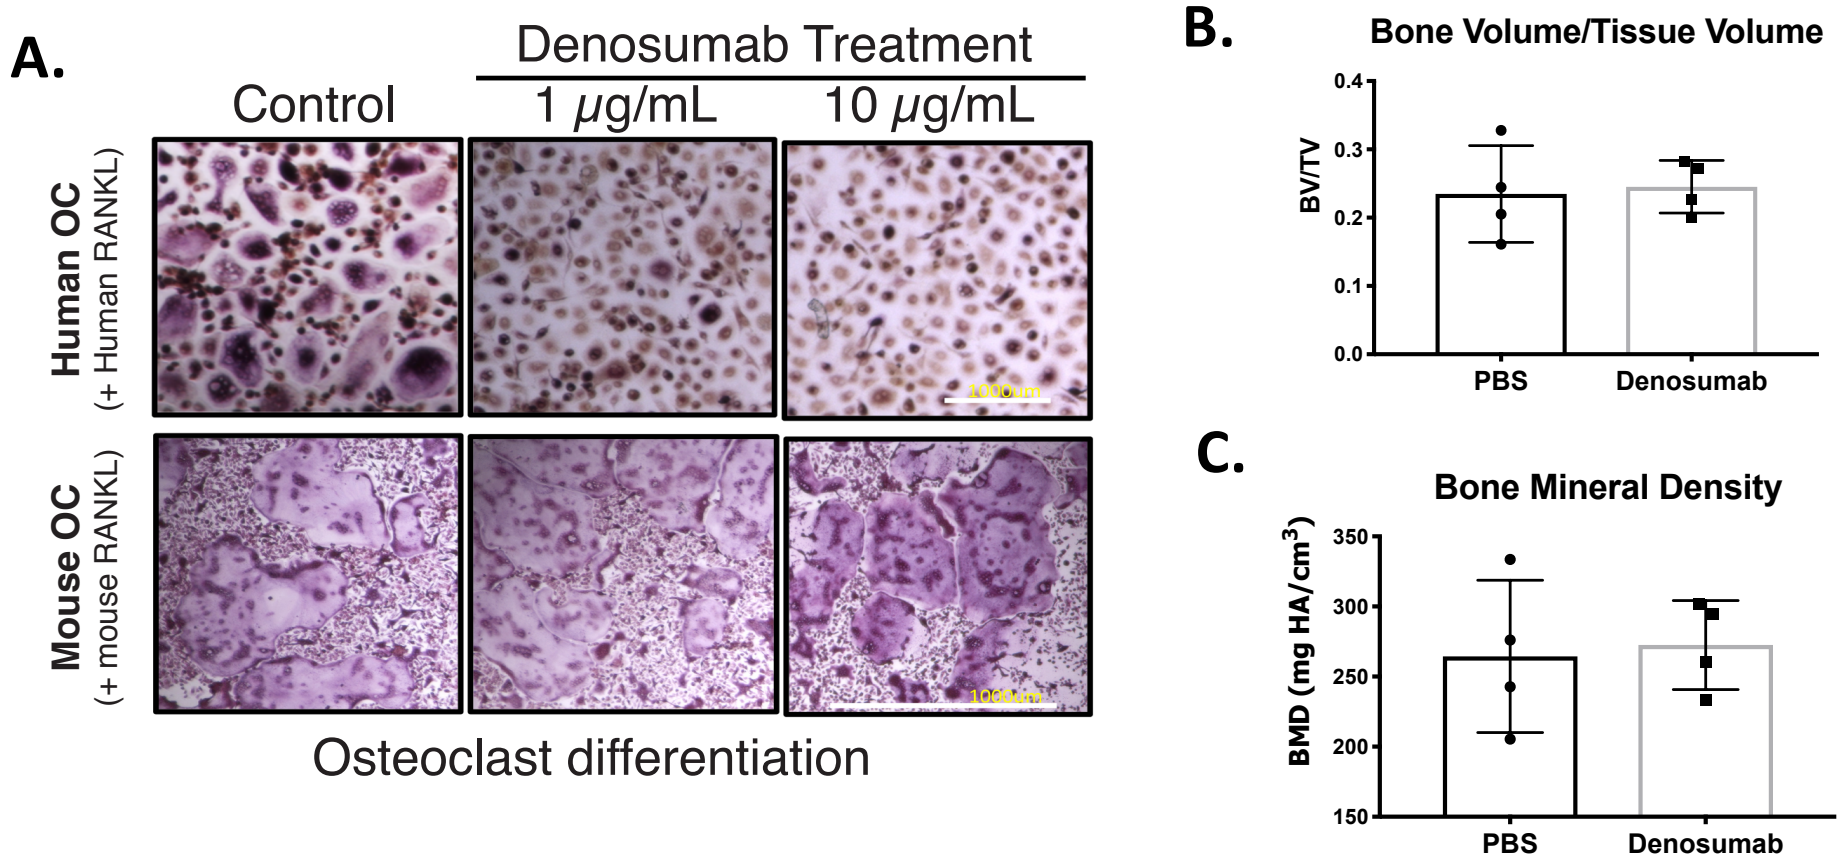

**S. Figure 5. (A)** Tartrate-resistant acid phosphatase (TRAP) staining of human and mouse osteoclast (OC) with denosumab treatment in vitro. Human CD14<sup>+</sup> monocyte-derived and mouse bone marrow-derived macrophages were cultured in the presence of mouse MCSF (50 ng/mL) and RANKL (50 ng/mL) or human MCSF (20 ng/mL) and RANKL (40 ng/mL), with or without the treatment of denosumab (final concentration: 1  $\mu\text{g}/\text{mL}$ , 10  $\mu\text{g}/\text{mL}$ ) for 5 days. TRAP staining was performed to stain the TRAP positive osteoclast. Bar represents 1000  $\mu\text{m}$ ); **(B)** Non-tumor bearing NSG mice were treated with denosumab from day 3 for 3 weeks twice weekly before sacrifice. Tibiae were collected for  $\mu\text{CT}$  analysis for calculation of trabecular bone to tissue volume ratio (BV/TV) and **(C)** bone mineral density (BMD), n=4 bones per group. Error bars in this figure represent SEM.

# Supplemental Figure 6

**A.**

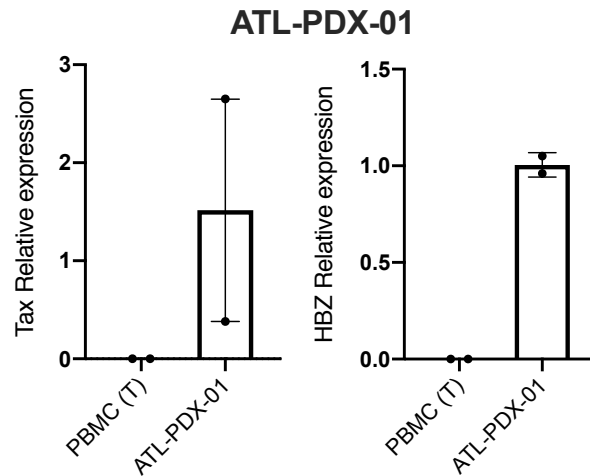

**B.**

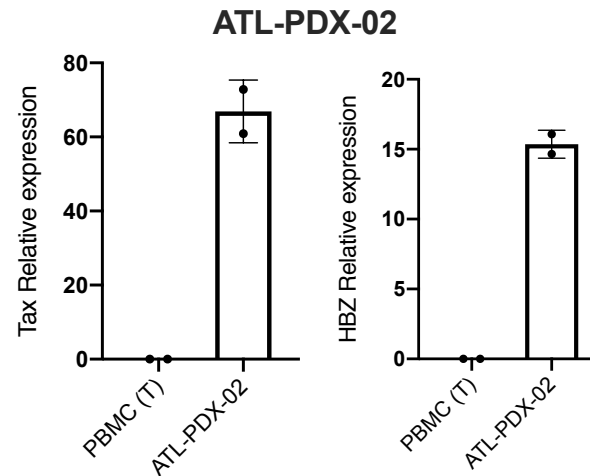

**C.**

|               | ATL-PDX-01 | ATL-PDX-02 |
|---------------|------------|------------|
| <b>CARD11</b> | N686K      |            |
| <b>TP53</b>   |            | I251N      |
| <b>NOTCH1</b> |            | E2460*     |
| <b>VAV1</b>   |            | Y174C      |
| <b>CCR4</b>   | G33D       |            |

**D.**

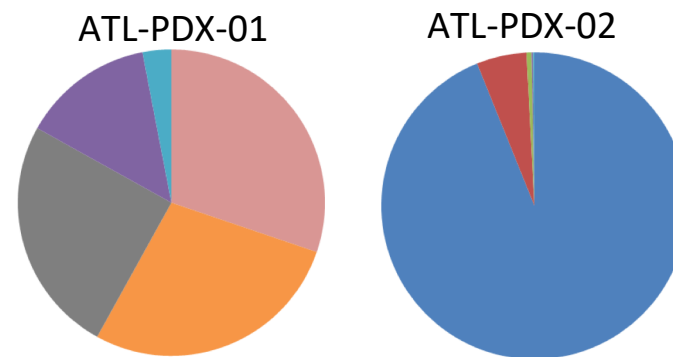

**S. Figure 6.** Tax and HBZ gene expression were examined by qRT-PCR in **A)** ATL-PDX-01 and **B)** ATL-PDX-02 cells. **C)** ATL cells from ATL-PDX-01 and ATL-PDX-02 patients carry different mutations. ATL genes with previously described activating mutations are shown in red; **D)** Clonal analysis based on proviral integration sites reveals that HTLV infected cells in PBMC from ATL-PDX-01 patient revealed oligoclonal expansion, whereas HTLV-1 infected cells in PBMC from ATL-PDX-02 were predominantly one clone. Top 5 clones shown for each patient.

# Supplemental Figure 7

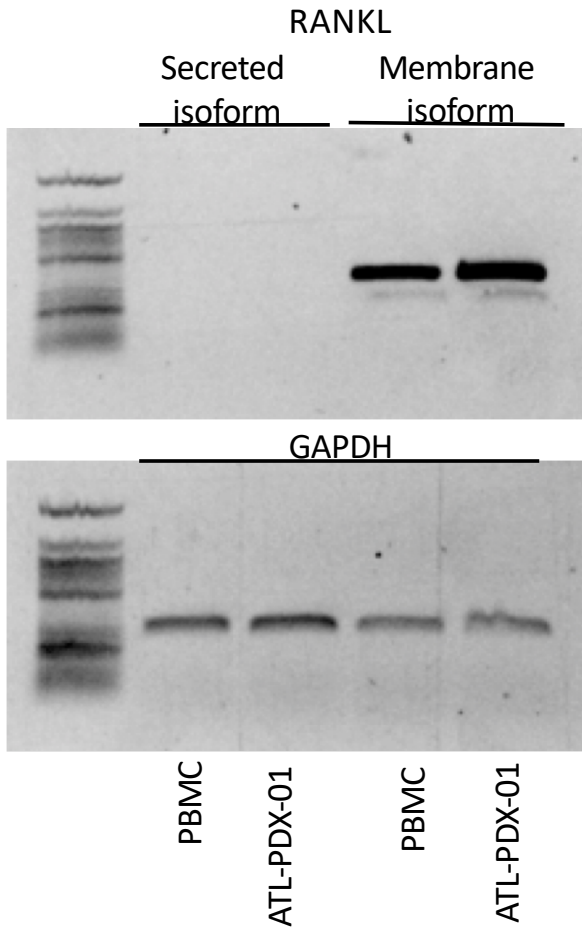

## S. Figure 7. Membrane-bound RANKL isoform is detected in PBMC and ATL-PDX-01 cells.

cDNA from PBMC or ATL-PDX-01 cells were synthesized using Quanta cDNA RT kit. PCR amplification of secreted or membrane-bound RANKL was as previously described in Walsh et al. *Gene and Immunity*, 2013: primers RANKL-EST-F-248 (5'-AGAAACTGCTGAAATATTGAACACA-3') and sRANKL-R-450 (5'-CCCCGATCATGGTACCAAGAGGAC-3') were used to amplify the secreted RANKL isoform; primers hRANKL-F-315 (5'-AGCGTCGCCCTGTTCTTCTA-3') and EC-R-744 (5'-TGTCGGTGGCATTAAATAGTGAGA-3') were used to amplify the membrane-bound RANKL isoform.

Sample **PBMC from HTLV-1 infected humanized mouse**  
**TRB (T-cell receptor beta)**  
**Total count 384,262**

| CLONAL |                                                                                                                                                                                                                                               |        |             |        |        |               |              |                                                                 |  |
|--------|-----------------------------------------------------------------------------------------------------------------------------------------------------------------------------------------------------------------------------------------------|--------|-------------|--------|--------|---------------|--------------|-----------------------------------------------------------------|--|
| Rank   | Sequence                                                                                                                                                                                                                                      | Length | Merge count | V-gene | J-gene | % total reads | Cumulative % | CDR3 Sequence                                                   |  |
| 1      | CCTTCCCATTTTAATCACTGCCTTTGTCTT<br>TTCCAAGCCCCACACAGTCAGACTAACCT<br>CTGCCACCTGCGCTTCTGCCGCTGCCCA<br>GTGGTTGGGGAGGGGACTAGCAGGG<br>AGGAAACATTTTTGTATCATGGTGTAAACAT<br>TGTGGGGACTAGCGGTCTAACACCGGG<br>AGCTGTTTTTGGAGAAGGCTCTAG                    | 199    | 25835       | Db2    | Jb2-2  | 6.7           | 6.7          | not found                                                       |  |
| 2      | GGAGGTGAGAAGGAAGCCCCGGCCTG<br>GTCCATACCCACCCCACTTGCATAAT<br>GGGGGGTGATGTACCCACCTCCACTCC<br>CCTCAAAGGAGCAGCTGCTCTGGTGGTCT<br>CTCCAGGCTCTGGGGCGGACCCATGG<br>GAGGGGCTGTTTTGTACAAAGCTGTAAC<br>ATTGTGGGGACAGGAAGGACTATAAT<br>TCACCCCTCCACTTTGGGAAT | 220    | 21026       | Db1    | Jb1-6  | 5.5           | 12.2         | not found                                                       |  |
| 3      | GACTGAGGCTGATTTACTCAGCTTCTG<br>AGGGTACCACTGACAAAGGAGAAGTCCC<br>CAATGGCTACAATGTCTCCAGATTAACA<br>AACGGGAGTTCTCGCTCAGGCTGGAGTC<br>GGCTGCTCCCTCCAGACATCTGTGACT<br>TCTGTGCCAGCAGTCCCCCGGACCCAC<br>ACCGCTCTGGGCAACGCTCTGACTTT<br>CGGGCCGGCAGCAG     | 217    | 14354       | Vb6-1  | Jb2-6  | 3.7           | 15.9         | GCCAGCAGTCCCC<br>CCGCGACCCACAC<br>CCGCTCTGGGGCC<br>AACGTCCTGACT |  |
| 4      | ATGGGCTGAGGCTGATCTATTACTCAGCA<br>GCTGCTGATATTACAGATAAAAGGAGAAGT<br>CCCCGATGGCTATGTTGTCTCCAGATCCA<br>AGACAGAGAAATTTCCCTCACTCTGGAG<br>TCAGCTACCCGCTCCAGACATCTGTGTA<br>TTTCTGCGCCAGCAGACCGGGACAGGGT<br>AATTCACCCCTCCACTTTGGGAAT                  | 197    | 9532        | Vb10-2 | Jb1-6  | 2.5           | 18.4         | GCCAGCAGACCG<br>GGACAGGGTAATT<br>CACCCCTCCAC                    |  |
| 5      | CCTTCCCATTTTAATCACTGCCTTTGTCTT<br>TTCCAAGCCCCACACAGTCAGACTAACCT<br>CTGCCACCTGCGCTTCTGCCGCTGCCCA<br>GTGGTTGGGGAGGGGACTAGCAGGG<br>AGGAAACATTTTTGTATCATGGTGTAAACAT<br>TGTGGGGACCCGAGGCTCTACAATGA<br>GCAGTTCTTCGGGCCAGG                           | 193    | 8326        | Db2    | Jb2-1  | 2.2           | 20.6         | not found                                                       |  |

**TRG (T cell receptor gamma)**  
**Total count 533,190**

| NON-CLONAL |                                                                                                                                                                         |        |             |        |        |               |              |                                                 |  |
|------------|-------------------------------------------------------------------------------------------------------------------------------------------------------------------------|--------|-------------|--------|--------|---------------|--------------|-------------------------------------------------|--|
| Rank       | Sequence                                                                                                                                                                | Length | Merge count | V-gene | J-gene | % total reads | Cumulative % | CDR3 Sequence                                   |  |
| 1          | TGGGTAAAGACAAGCAACAAAGTGGAGGC<br>AAGAAAGAATTCTCAAACCTCACTTCAAT<br>CCTTACCATCAAGTCCGTAGAGAAAGAAG<br>ACATGGCCGTTTACTACTGTGCTGCGTGG<br>GGTGGTTGGTTCAAGATATTTGCTG           | 141    | 58130       | Vg10   | JgP1   | 10.9          | 10.9         | GCTGCGTGGGGT<br>GGTTGGTTCAAGA<br>TA             |  |
| 2          | GGAATCAGTCGAGAAAAGTATCACTTA<br>TGCAAGCACAGGGAAGAGCCTTAAATTTA<br>TACTGGAAAATCTAATTGAACGTGACTCT<br>GGGGTCTATTACTGTGCCACCTGGGACCT<br>ACCGCAAGAGTTGGGCAAAAAATCAAG           | 144    | 38445       | Vg8    | JgP    | 7.2           | 18.1         | not found                                       |  |
| 3          | GGAATCAGTCGAGAAAAGTATCACTTA<br>TGCAAGCACAGGGAAGAGCCTTAAATTTA<br>TACTGGAAAATCTAATTGAACGTGACTCT<br>GGGGTCTATTACTGTGCCACCTGGGACCT<br>TCCCTAACACTGGTTGGTTCAAGATATTTG<br>CTG | 149    | 34536       | Vg8    | JgP1   | 6.5           | 24.6         | not found                                       |  |
| 4          | GGAGTCAGTCCAGGGAAGTATTACTTA<br>CGCAAGCACAAAGGAACACTTGAGATTGA<br>TACTGCGAAAATCTAATTGAAAATGACTCTG<br>GGGTCTATTACTGTGCCACCTGGGACGGC<br>TTCGGTTCTGATTGGATCAAGACGTTTGC<br>AA | 148    | 17476       | Vg2    | JgP2   | 3.3           | 27.9         | GCCACCTGGGACG<br>GCTTCGGTTCTGA<br>TTGGATCAAGACG |  |
| 5          | GGAATCAGTCGAGAAAAGTATCACTTA<br>TGCAAGCACAGGGAAGAGCCTTAAATTTA<br>TACTGGAAAATCTAATTGAACGTGACTCT<br>GGGGTCTATTACTGTGCCACCTGGGATAG<br>GTAAGAGTTGGGCAAAAAATCAAG              | 141    | 15502       | Vg8    | JgP    | 2.9           | 30.8         | not found                                       |  |

**Supplemental Table 1.** Genomic DNA harvested from PBMC was submitted to Invivoscribe (<https://www.invivoscribe.com/>) for TRB (T cell receptor beta) and TRG (T cell receptor gamma) gene rearrangement analysis and quantitation.
